# Supplementary material
Source: PubMed Central journal article supplement (PMC1100771)
Supplement: pnas_102_19_6919__1.pdf [file pnas_102_19_6919__1.pdf]

**δ1→**

Onmy-IgD.1 1 LQRVIPPNITLYPLWEELEVGSKVGILCILSGFYDPKLSVEWLLDDKTVTTPSPVQKQLQSVEGEDKIFSLNSQLELDQSOWTQG 84  
 Onmy-IgD.2 1 LQRVIPPNITLYPLWEEELKVGSKVGILCILSGFYDPKLSVEWLLDDKTVTTPSPVQRKLQSVEGEEKTFSLNSQLELDQRSOWTQG 84  
 \*\*\*\*\* \* \*\*\*\*\*

**δ2a→**

Onmy-IgD.1 85 SEVTCCKATHNAAQGPPTGTPVSRRTSICSAFSPSTPSIHLETPTFRFTVMTQTEVTATCVVHSAYDSNVSWLLDGKDPTSRTPVN 168  
 Onmy-IgD.2 85 SEVTCCKATHNAAQGPPTGTPVSRRTSICSAFLSSTPSIDLETPRFRFTVMTQTEVTATCVVHSAYDAKVSWLLDGKDPTSRTPVN 168  
 \*\*\*\*\*

**δ3a→**

Onmy-IgD.1 169 QASRTTQSISSNLTLPSSQWKTLNNTITCRAEHRFCNSTEKTSNVKGPVAVSSTTVLIRRSLPELLKGD<sup>SAVLE</sup>CAITQLSSSDL 252  
 Onmy-IgD.2 169 QASRTTQSVSSNLTLPSSQWKTLNNTITCRAEHRFCNSTEKTSNVKGPVAVSSTTVLIRRSLPELLKGD<sup>SAVLE</sup>CAITQLSSSDL 252  
 \*\*\*\*\*

**δ4b→**

Onmy-IgD.1 253 YVTFQANGVDFPEKQYVDLPASNGPHSLTKRFSIPKSHWKT<sup>DNTFT</sup>CKVNQGYNSWVSSSKIKLFGELSMELLLVPSEESSGS 336  
 Onmy-IgD.2 253 YVTFQANGVDFPEKQYVDVPASKGPHLLTRLFSIPKSHWKT<sup>DNTFT</sup>CKVNQGFNSLWVSSSKVKLFGELSMELLLVPSEESSGS 336  
 \*\*\*\*\*

**δ2b→**

Onmy-IgD.1 337 GTQKLMCSGWGFNPKIKWLSGSEQSAADNEIRMGEDGHVALTSHITVTVQEQWNEGKDFICEVDDKDLQKTVRKSTSLCTAFPS 420  
 Onmy-IgD.2 337 GTQKLMCSGWGFNPKIKWLSGFQ<sup>RS</sup>AADNEISMEDGHVALTSHITVTVQEQWNEGKDFICEVDDKDLQKTVRKSTSLCTAFPS 420  
 \*\*\*\*\*

Onmy-IgD.1 421 STPSLHLET<sup>PRFRFTVMTQTEVTAT</sup>CVVHSAYDAKVS<sup>WLLDGKDPTSRTPV</sup>NQASSTTQSISSNLTLPSSQWKTLNNTITCRAEHR 504  
 Onmy-IgD.2 421 STPYLHLET<sup>PRFRFTVMTQTEVTAT</sup>CVVHSAYDAKVS<sup>WLLDGKDPTSRTPV</sup>NQASRTTQSVSSNLTLPSSQWKTLNNTITCRAEHR 504  
 \*\*\* \*\*\*\*\*

**δ7→**

Onmy-IgD.1 505 CFNSTEKTRNVKGSVTPSAPTATLLQGPSELVCLVLGFSPSDINITWLLDNVTELWNNNTSTPYRAPGGKFGIRSHLSLARQDL 588  
 Onmy-IgD.2 505 CFNSTEKTSNVKGSVTPSAPRATLLQGPSELVCLVLGFSPSDINITWLLDNVTELWNNNTSTPYRAPGGKFGIRSHLSLAHQDW 588  
 \*\*\*\*\*

**TM1→**

**TM2**

Onmy-IgD.1 589 TPGAVYTCRVTHHTQTALANISKPELLEVEGVFFDENRSEPI<sup>LADTA</sup>EENWNMACIFLVLFLISLLYSFTVTLV<sup>KTK</sup> 665  
 Onmy-IgD.2 589 TPGAVYTCRVTHHTQTALANISKPEILELEGVFFDENRSDPI<sup>LADTA</sup>EENWNMACIFLVLFLISLLYSFTVTLIK<sup>TK</sup> 665  
 \*\*\*\*\*
