# Supplementary material
Source: PubMed Central journal article supplement (PMC1100771)

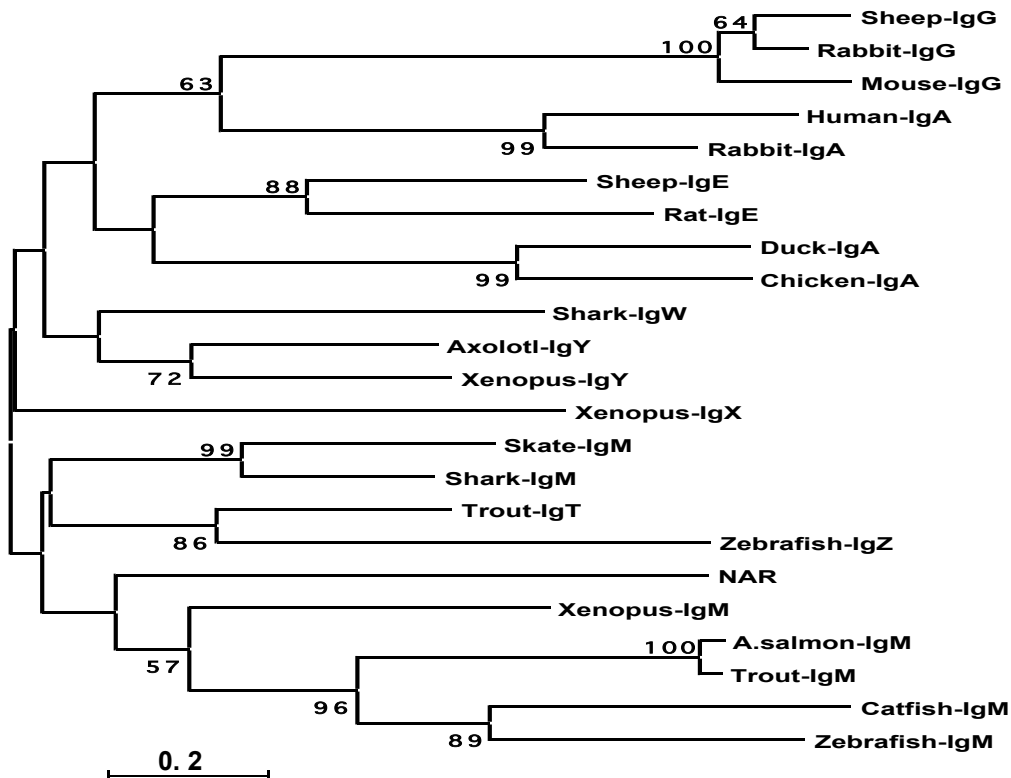

Supplement: pnas_102_19_6919__2.pdf [file pnas_102_19_6919__2.pdf]

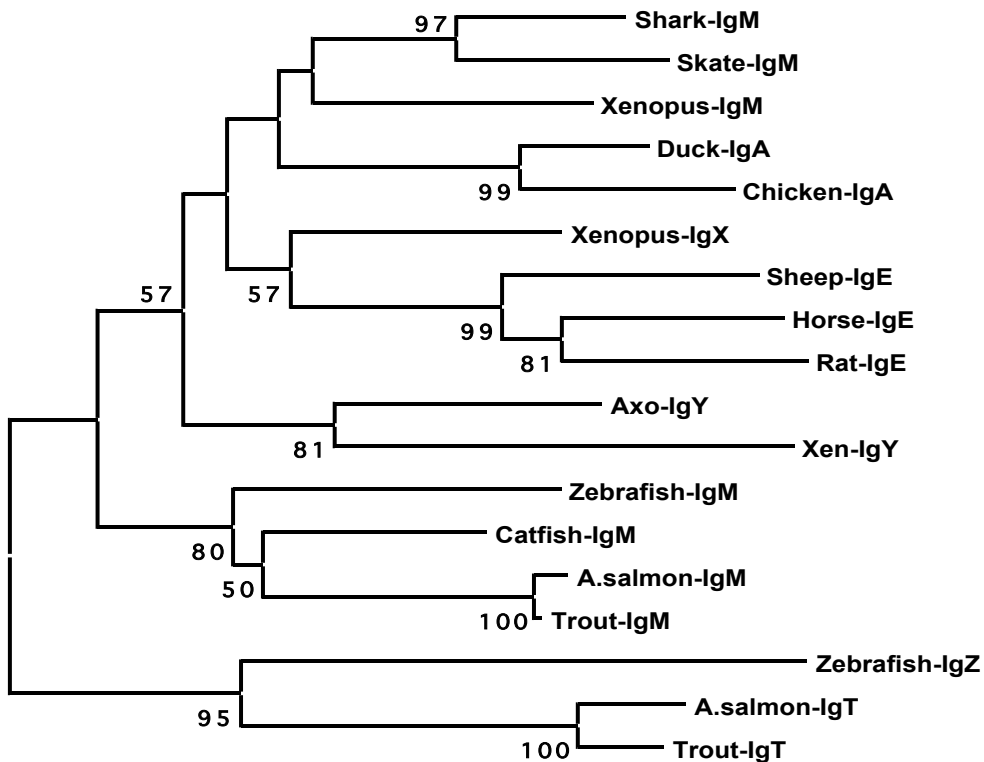

0.2

Supplement: pnas_102_19_6919__3.pdf [file pnas_102_19_6919__3.pdf]

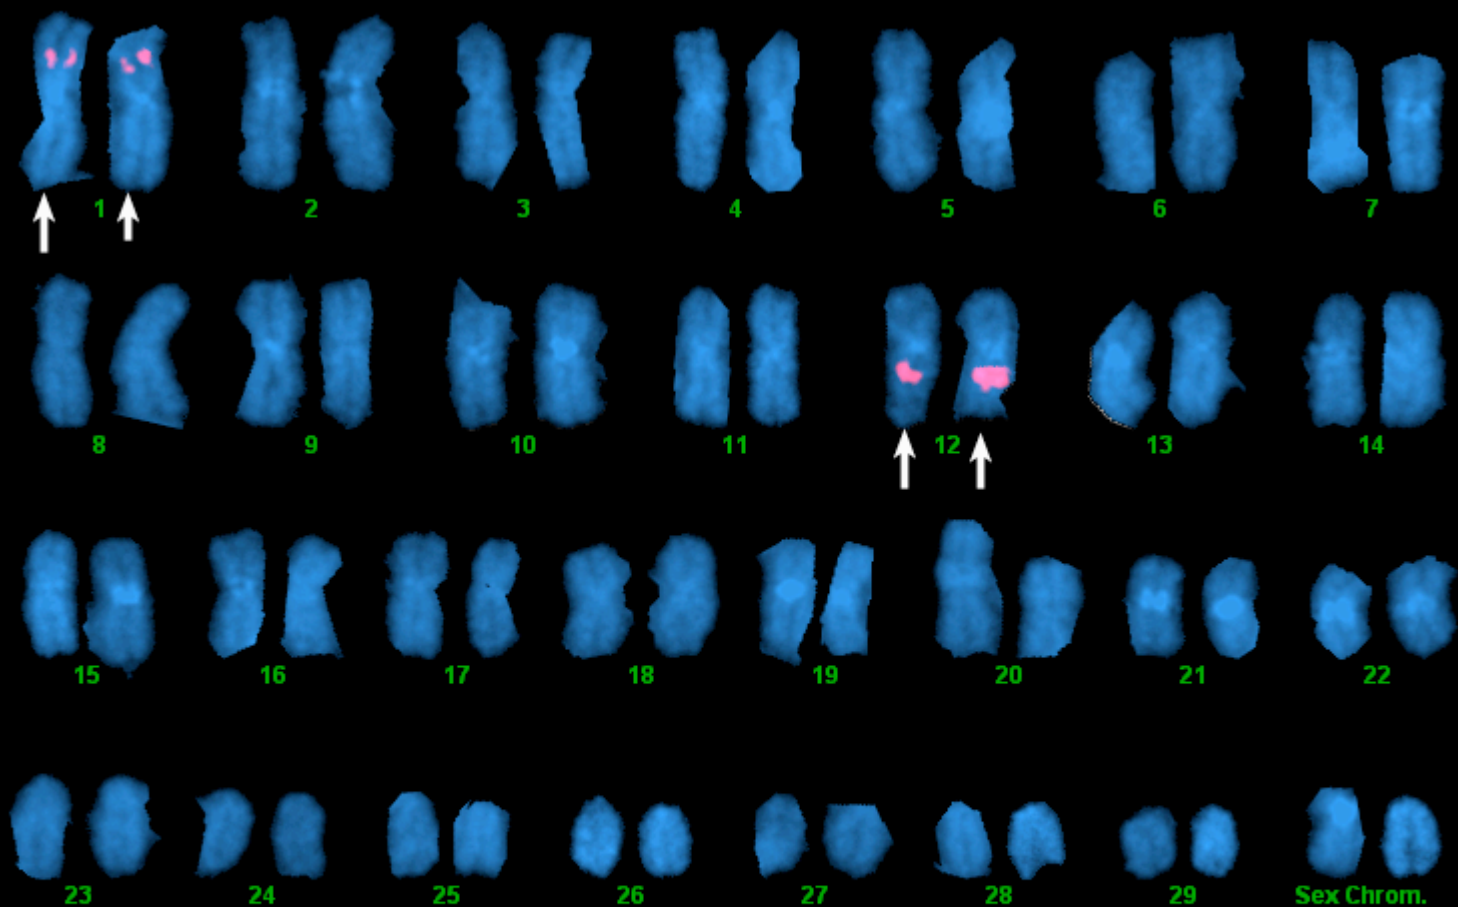

Supplement: pnas_102_19_6919__4.pdf [file pnas_102_19_6919__4.pdf]
